# Supplementary material for: Detecting Emotional Contagion in Massive Social Networks
Source: PLoS One. 2014 Mar 12;9(3):e90315. doi: 10.1371/journal.pone.0090315 (PMC3951248; doi:10.1371/journal.pone.0090315)
Supplement: Text S1 — This document contains the detailed derivation of the model, description of estimation techniques, exposition of results and robustness tests. (PDF) [file pone.0090315.s001.pdf]

# Supporting Information for Detecting Emotional Contagion in Massive Social Networks

Lorenzo Coviello, Yunkyu Sohn, Adam D.I. Kramer,  
Cameron Marlow, Massimo Franceschetti,  
Nicholas A. Christakis, James H. Fowler

# Contents

|   |                                                       |    |
|---|-------------------------------------------------------|----|
| 1 | A model of emotional contagion                        | 3  |
| 2 | Aggregating the model                                 | 5  |
| 3 | Data                                                  | 6  |
| 4 | Variables of the model                                | 7  |
| 5 | Model estimation                                      | 9  |
| 6 | Quantifying the total effect of a user on her friends | 16 |
| 7 | How rain affects friends in other cities              | 17 |
| 8 | Tables                                                | 20 |
|   | Bibliography                                          | 38 |

# 1 A model of emotional contagion

Let  $y_{it}$  be the emotional expression of individual  $i$  at time  $t$ . Let  $a_{ijt}$  be the strength of the relationship from individual  $i$  to individual  $j$  at time  $t$ . Note that  $a_{ijt}$  need not be symmetric ( $i$  may perceive a stronger relationship with  $j$  than  $j$  does with  $i$ ), and it allows for temporal variations. Let  $\delta_{it} = \sum_j a_{ijt}$  be the degree of individual  $i$  at time  $t$ .

In the simplest case,  $a_{ijt}$  can take binary values, 1 designating that a relationship between  $i$  and  $j$  exists at time  $t$ , 0 designating that it does not. Under this assumption,  $\delta_{it}$  is simply the number of her social contacts of  $i$  at time  $t$ .

Suppose there are three kinds of exogenous factors that affect emotion. First, there are factors that are time-varying and affect everyone equally (like holidays, for example). We denote these with a fixed effect  $\theta_t$  for each time period  $t$ . Second, there are factors that are time-invariant and specific to an individual (such as a person's baseline personality). We denote these with a fixed effect  $f_j$  for each individual  $j$ . Third, some factors are *both* time-varying and specific to an individual (like the weather). We denote these by  $x_{jt}$  for each individual  $j$  and time period  $t$ .

In addition, suppose there is an endogenous factor that affects the emotion of each individual in proportion to the strength of the relationship between  $j$  and her social contacts. That is, each individual  $j$  is affected by the specific emotion on day  $t$  of each individual  $i$  to whom she is connected.

Assuming a memoryless model where individuals influence each other only within a time period  $t$  and not across time periods, we can specify a *linear model* for the emotion  $y$  of individual  $j$  on day  $t$ :

$$y_{jt} = \theta_t + f_j + \beta x_{jt} + \gamma \frac{1}{\delta_{jt}} \sum_i a_{ijt} y_{it} + \epsilon_{jt}, \quad (1)$$

where  $\beta$  indicates the strength and direction of influence of the time-varying exogenous factor,  $\gamma$  indicates the strength and direction of social influence, and  $\epsilon_{jt}$  is a normally distributed error term with mean zero and variance  $\sigma^2$  that is independent and identically distributed (i.i.d.) across both individuals and time.

Observe that the model in equation (1) assumes that influence is averaged over all social contacts and therefore inversely proportional to the cumulative weight  $\delta_{jt}$  of all  $j$ 's relationships. If  $a_{ijt}$  takes binary values, then this implies that the influence from  $i$  to  $j$  is inversely proportional to the number of  $j$ 's social contacts. This assumption is based on the idea that an individual with many social contacts is less likely to be influenced by each single contact  $i$  than an individual with few social contacts.

We are interested in estimating the value of the influence factor  $\gamma$ , which is difficult due to the inherent *feedback* present in the process of emotional contagion. Correlation in emotions may not only be the result from pairwise mutual influence, but also from cycles in the social network. For example,  $i$  might influence  $k$ 's emotional expression, which in turn affects  $j$ 's emotional expression, and so on. We address the inherent endogeneity of contagion in Section 5 by using instrumental variable regression [2].

A second difficulty here is the large size of our data set. We would like to apply our model to the longitudinal content generated by millions of users with billions of friends over hundreds of days. We address this difficulty in Section 2, where we propose a method to estimate the individual-level parameter  $\gamma$  using aggregated data. A key to this method is to identify a unit of analysis in which many individuals within the same subpopulation are affected by the same exogenous variables. For example, individuals  $i$  and  $j$  may be in the same city  $g$  and therefore experience the same weather, traffic conditions, sporting event outcomes, and so on. Or they may be in different cities  $g$  and  $h$ , in which case their different exposures to exogenous factors may help us to identify how one person affects another. In our aggregated model, we leverage these between-unit social ties to consider how a factor in city  $g$  affects individual  $i$ , which in turn affects individual  $j$  who was not exposed directly to that factor because she is in city  $h$ . In other words, if it rains on you in New York, does it make your friends in San Diego less happy?

## 2 Aggregating the model

The model in equation (1) can be computationally demanding in big data sets, since there is one observation for each individual-time pair. We therefore simplify the model further by averaging equation (1) over all  $n_g$  individuals in a given subpopulation  $S_g$  who are in city  $g$ .

$$\frac{1}{n_g} \sum_{j \in S_g} y_{jt} = \frac{1}{n_g} \sum_{j \in S_g} \left( \theta_t + f_j + \beta x_{jt} + \gamma \frac{1}{\delta_{jt}} \sum_i a_{ijt} y_{it} + \epsilon_{jt} \right). \quad (2)$$

We can change the notation to make things clearer.

Let  $\bar{y}_{gt} = \frac{1}{n_g} \sum_{j \in S_g} y_{jt}$  be the average emotion at time  $t$  for all individuals in subpopulation  $S_g$ .

Let  $\bar{f}_{gt} = \frac{1}{n_g} \sum_{j \in S_g} f_j$  be the average individual fixed effects for all individuals in subpopulation  $S_g$  (this is therefore a city-level fixed effect).

Let  $\bar{x}_{gt} = \frac{1}{n_g} \sum_{j \in S_g} x_{jt}$  be the average exogenous variable at time  $t$  for all individuals in subpopulation  $S_g$  (this is therefore a city-level exogenous variable).

Let  $\bar{Y}_{gt} = \frac{1}{n_g} \sum_{j \in S_g} \frac{1}{\delta_{jt}} \sum_i a_{ijt} y_{it}$ . We can exchange the ordering of the summations and write

$$\bar{Y}_{gt} = \sum_i y_{it} \frac{1}{n_g} \sum_{j \in S_g} \frac{1}{\delta_{jt}} a_{ijt}$$

Observe that the term  $\frac{1}{n_g} \sum_{j \in S_g} \frac{1}{\delta_{jt}} a_{ijt}$  represents the average strength of the relationship between  $i$  and an individual in city  $g$ . Therefore,  $\bar{Y}_{gt}$  represents the average emotional influence at time  $t$  on an individual in city  $g$ .

The model in equation (2) can now be written as

$$\bar{y}_{gt} = \theta_t + \bar{f}_g + \beta \bar{x}_{gt} + \gamma \bar{Y}_{gt} + \bar{\epsilon}_{gt} \quad (3)$$

where  $\bar{\epsilon}_{gt} = \frac{1}{n_g} \sum_{j \in S_g} \epsilon_{jt}$  is a city-specific error for all individuals  $j$  who are in city  $g$ . Since the error is a mean of normally distributed variables,

$\bar{\epsilon}_{gt}$  will also be normally distributed with mean 0, but it will have a city-specific variance  $\sigma^2/n_g$ . Notice that this indicates the variance is inversely proportional to the number of individuals in a city. As we describe below, we can use the equation for the variance explicitly to weight each observation in the model.

### 3 Data

Our period of observation starts on January 1<sup>st</sup> 2009 and ends on March 31<sup>st</sup> 2012, for a total of 1185 consecutive days. Data for five days of 2009 (March 4<sup>th</sup>, June 24<sup>th</sup>, August 15<sup>th</sup>, September 13<sup>th</sup>, November 11<sup>th</sup>) was not available at the time of analysis, so we consider the remaining 1180 days.

Data were collected from the Facebook online social network, and data were analyzed in aggregate within Facebook’s data centers. Researchers did not access any personal information.

For each day in the period of observation, we consider all Facebook users in the 100 most populous US cities, and their status updates. Table 1 reports the list of the cities, each paired with the corresponding three-letter code used in the figures (airport codes in most cases). In particular, the subpopulation of Facebook users in a given city contains all users that (i) chose English as the language in which they view the website, (ii) selected United States as Country in their profile settings, (iii) can be matched to city  $g$  by IP-based geographic location. We build separate user pools for different days to allow us to take user mobility into account, since on any particular day a user might travel or move to a new city.

For each Facebook user, we measured emotion using all status updates as explained in the next section. We used only status updates, which can be viewed as personal self-expression, and did not consider more directed forms of communication on Facebook (e.g., chat, private messages, comments). We also measured social contacts for each day in the observation period, letting  $a_{ijt} = 1$  for all pairs of users  $i$  and  $j$  who were “friends” with one another on day  $t$ , and 0 otherwise.

Table 2 summarizes our sample size by showing mean and standard deviation of the daily number of users, number of status updates, and friendship ties.

## 4 Variables of the model

### 4.1 Emotion variables

For user  $i$  and day  $t$ , let  $U_{it}$  be the set of status updates posted by  $i$  on day  $t$ , and let  $u_{it} = |U_{it}|$  be its cardinality. Let  $u_{it}^{(p)}$  be the number of status updates in  $U_{it}$  that contain at least one word from the “positive emotion” category defined by LIWC 2007 [1]. Similarly, let  $u_{it}^{(n)}$  be the number of status updates in  $U_{it}$  that contain at least one word from the “negative emotion” category.

Note that a single status update might contain both a negative word and a positive word, therefore contributing to both  $u_{it}^{(p)}$  and  $u_{it}^{(n)}$ . Moreover, our analysis simply considers raw matching of positive and negative words, without making any attempt to identify expressions like negations or sarcasm.

We measure emotion in two ways based on these definitions: (i) the rate of status updates that contain words, (ii) the rate of status updates that contain negative words.

Consider a user  $i$  and a day  $t$  such that  $u_{it} \neq 0$ . The positive rate of user  $i$  on day  $t$  is defined as

$$y_{it}^{(p)} = \frac{u_{it}^{(p)}}{u_{it}},$$

that is, the fraction of status updates with at least one positive word. Note that  $0 \leq y_{it}^{(p)} \leq 1$ .

Similarly, the negative rate of user  $i$  on day  $t$  is defined as

$$y_{it}^{(n)} = \frac{u_{it}^{(n)}}{u_{it}},$$

that is, the fraction of status updates with at least one negative word. Note that  $0 \leq y_{it}^{(n)} \leq 1$ .

By averaging these quantities over all users in city  $g$ , we obtain the average positive rate and negative rate of that city. Let  $S_g$  be the set of  $n_g$  users  $i$  in city  $g$  such that  $u_{it} \neq 0$ . That is,

$$\begin{aligned}\bar{y}_{gt}^{(p)} &= \frac{1}{n_g} \sum_{i \in S_g} y_{it}^{(p)}, \\ \bar{y}_{gt}^{(n)} &= \frac{1}{n_g} \sum_{i \in S_g} y_{it}^{(n)},\end{aligned}$$

Table 3 shows mean values for each of these emotion variables.

The variables  $\bar{Y}_{gt}^{(p)}$  and  $\bar{Y}_{gt}^{(n)}$  of the model in equation (3) are given by

$$\begin{aligned}\bar{Y}_{gt}^{(p)} &= \sum_i y_{it}^{(p)} \frac{1}{n_g} \sum_{j \in S_g} \frac{1}{\delta_{jt}} a_{ijt}, \\ \bar{Y}_{gt}^{(n)} &= \sum_i y_{it}^{(n)} \frac{1}{n_g} \sum_{j \in S_g} \frac{1}{\delta_{jt}} a_{ijt}.\end{aligned}$$

## 4.2 Meteorological variables

For each day in the period of observation, meteorological data for the 100 US cities under observation were made available by the US National Climatic Data Center (NCDC, <http://www.ncdc.noaa.gov>). For each city, we consider the data from the NCDC station closest to the airport or to the city center.

For each city  $g$  and day  $t$  we consider a binary indicator variable  $\bar{x}_{gt}$  equal to 1 if it rained in city  $g$  on day  $t$  and equal to 0 otherwise. Table 4 shows the number of rainy days in each city, during the period of observation.

For the instrumental variable regression described below we will make use

of the variable

$$\bar{X}_{gt} = \sum_i x_{it} \frac{1}{n_g} \sum_{j \in S_g} \frac{1}{\delta_{jt}} a_{ijt}. \quad (4)$$

In particular, if user  $i$  is in city  $h$  then  $x_{it} = \bar{x}_{ht}$  (the user's own weather is the same as the average weather of all users in the same city).

## 5 Model estimation

We are interested in estimating the parameters of the model in equation (3), which is simply an aggregated restatement of the individual-level model in equation (1). To recap, this model is:

$$\bar{y}_{gt} = \theta_t + \bar{f}_g + \beta \bar{x}_{gt} + \gamma \bar{Y}_{gt} + \bar{\epsilon}_{gt},$$

and we are primarily interested in estimating the effect of emotional contagion ( $\gamma$ ). The dependent variable  $\bar{y}_{gt}$  is the average emotion of users in city  $g$  on day  $t$ , the independent variable  $\bar{Y}_{gt}$  is the average emotion of the friends of these users,  $\bar{x}_{gt}$  is a binary indicator variable for rainfall in city  $g$ , and  $\theta_t$  and  $\bar{f}_g$  are fixed effects for each day and each city.

Note that we can estimate  $\gamma$  for contagion of either positive and negative emotion, and we can also see if these two emotions tend to inhibit one another by estimating the effect of friends' positive emotion on users' negative emotion and vice versa.

An observation period of 1180 days and a set of 100 cities results in a model with 118,000 observations, each corresponding to a city-day pair. The parameters that need to be estimated are the coefficients  $\beta$  and  $\gamma$ , 1180 fixed effects for the days, and 100 fixed effects for the cities.

Since one of the explanatory variables of the model in equation (3),  $\bar{Y}_{gt}$ , is an endogenous variable (i.e. it is correlated both to the dependent variable  $\bar{y}_{gt}$  and to the error term  $\bar{\epsilon}_{gt}$ ), ordinary least squares regression would yield biased coefficient estimates. We therefore use *instrumental variable regression* [2].

Instrumental variable regression is an estimation method that can produce consistent and unbiased estimates when one of the explanatory variables is correlated with the error terms in the model equation. This is the case when there is *reciprocal causality* from the dependent variable to an explanatory variable (in our case, users affect their friends and vice versa), when one or more relevant explanatory variables are omitted from the model, or when the covariates are affected by measurement errors. If an *instrument* is available that predicts the endogenous variable, then consistent and unbiased estimates can be obtained. In a linear model, an instrument for an endogenous explanatory variable  $v$  is a variable  $z$  that does not appear in the model equation, is correlated with  $v$  (conditional on all the exogenous explanatory variables) and is not correlated with the error term. [2]

In our model, an instrument for the endogenous explanatory variable  $\bar{Y}_{gt}$  is an exogenous variable  $z$  that is not correlated to the error term in equation (3), that is  $Cov(z, \hat{\epsilon}_{gt}) = 0$ , and is partially correlated to  $\bar{Y}_{gt}$  when controlling for the other exogenous explanatory variables. In the context of our model, we can write:

$$\bar{Y}_{gt} = \theta'_t + \bar{f}'_g + \beta_2 \bar{x}_{gt} + \beta_1 z + \nu_{gt}, \quad (5)$$

where  $\nu_{gt}$  is an error term not correlated to any regressors and  $\theta'_t$  and  $\bar{f}'_g$  are separately estimated time and subpopulation fixed effects.

Equation (5) can be seen as the linear projection of  $\bar{Y}_{gt}$  on the space of all the exogenous variables. Substituting equation (5) into equation (3) yields:

$$\bar{y}_{gt} = (\theta_t + \gamma \theta'_t) + (\bar{f}_g + \gamma \bar{f}'_g) + (\beta + \gamma \beta_2) \bar{x}_{gt} + \gamma \beta_1 z + \epsilon'_{gt}, \quad (6)$$

where the error term is uncorrelated with all the explanatory variables.

We use the variable  $\bar{X}_{gt}$  defined in equation (4) as the instrument ( $z$ ) for  $\bar{Y}_{gt}$ , as it is uncorrelated with the error term in equation (3) and it is partially correlated to  $\bar{Y}_{gt}$  (see Tables 5 to 8 for details). Specifically, we utilize rainfall experienced by the friends of users in city  $g$  to predict the emotion of those friends since it directly affects their mood.

The procedure above is equivalent to estimating the model in equation (3) using two stage least-squares (2SLS) regression. The first stage regression estimates a model of the form

$$\bar{Y}_{gt} = \theta'_t + \bar{f}'_g + \beta_1 \bar{X}_{gt} + \beta_2 \bar{x}_{gt} + \epsilon'_{gt}. \quad (7)$$

The second stage regression uses the predicted values  $\bar{Y}_{gt}^{pred}$  from the first stage to estimate the model

$$\bar{y}_{gt} = \theta_t + \bar{f}_g + \beta \bar{x}_{gt} + \gamma \bar{Y}_{gt}^{pred} + \bar{\epsilon}_{gt}. \quad (8)$$

Finally, recall that the variance of the  $\bar{\epsilon}_{gt}$  error term is proportional to  $\frac{1}{n_g}$  where  $n_g$  is the number of individuals in a city. We therefore weight each observation by the corresponding value of  $n_g$ .

A key assumption of instrumental variables regression is the exclusion restriction – the instrument must not directly influence the dependent variable. In our case, some of the users’ friends are experiencing the same weather as the users because they are in the same city. Therefore, in order to break any possible correlation between friends’ rainfall  $\bar{X}_{gt}$  and users’ rainfall  $\bar{x}_{gt}$ , we only consider observations for city-day pairs  $(g, t)$  such that  $\bar{x}_{gt} = 0$  (that is, it did not rain in city  $g$  on day  $t$ ). This results in dropping 30,300 observations, for a total of 87,700 remaining observations. Conditional on  $\bar{x}_{gt} = 0$ , equations (7) and (8) can be respectively written as

$$\bar{Y}_{gt} = \theta'_t + \bar{f}'_g + \beta_1 \bar{X}_{gt} + \epsilon'_{gt}, \quad (9)$$

$$\bar{y}_{gt} = \theta_t + \bar{f}_g + \gamma \bar{Y}_{gt}^{pred} + \bar{\epsilon}_{gt}. \quad (10)$$

Note that since  $\bar{x}_{gt} = 0$ , there is no rainfall for either the user or the user’s friends who are in the same city. This means that the instrument  $\bar{X}_{gt}$  now depends *only on friends who are in different cities* (not in city  $g$ ).

Tables 5 to 8 report the estimates (with standard errors, t-statistics, 95% confidence intervals, and diagnostic statistics) for the first and second stage of the 2SLS regression for the model in equation (3) (fixed effects estimates are not reported due to their number). The estimates of the emotional transmission parameter  $\gamma$  from the second stage regression are always significantly different than zero, and the two positive coefficients support the hypothesis of contagion. When users’ friends post positive status updates, it increases their own positive updates. When users’ friends post negative status updates, it increases their own negative updates. At the same time, the two negative coefficients for  $\gamma$  support the idea that opposite moods have an inhibitory effect. When users’ friends post positive status updates, it decreases their own negative updates. When users’ friends post negative status updates, it decreases their own positive updates.

In order to assess the quality of the estimates obtained via instrumental variable regression, we also compute diagnostic statistics.

First, we need to verify that the model is not underidentified. The Kleinbergen-Paap  $rk$  LM statistic allows to test the null hypothesis of underidentification [3], and all of our tests reject the null (test statistics are reported in the caption underneath each table).

Second, we need to verify that the instruments are good predictors of the endogenous explanatory variable in the first-stage regression (otherwise the instruments are considered *weak*). Weak instruments would cause poor predicted values in the first-stage regression (for example, little variation) and presumably poor estimation in the second-stage regression. To ensure the instruments are not weak, the Cragg-Donald Wald  $F$  statistic must exceed the critical threshold suggested by Stock and Yogo [5].

For robustness, we also tested a version of the model in equation (3) that only considers observations for city-day pairs  $(g, t)$  such that  $\bar{x}_{gt} = 1$  (that is, it rained in city  $g$  on day  $t$ ). This results in dropping 87,700 observations, for a total of 30,300 remaining observations. Tables 9 to 12 report the estimates (with standard errors, t-statistics, 95% confidence intervals, and diagnostic statistics) for the first and second stage of the 2SLS regression, which are substantially the same as the ones in Tables 5 to 8, with overlapping 95% CI. These results suggest that the users' own experience of rainfall does not affect emotional contagion online.

## 5.1 Simulation with Synthetic Data

Before applying the estimation strategy to empirical data, we run simulation to examine the validity of our approach. We generate synthetic data on a 2-dimensional geographical space in a manner to incorporate realistic properties of meteorological data and friendship networks. For simplicity, we assume invariant equilibrium behavior at a single snapshot observation. Each individual is located on a vertex of a grid on the geographical space,  $(d_{1i}, d_{2i}) \in [0, 1] \times [0, 1]$ . The 1-dimensional exogenous variable  $x$  is defined continuously over the geographical space drawn from

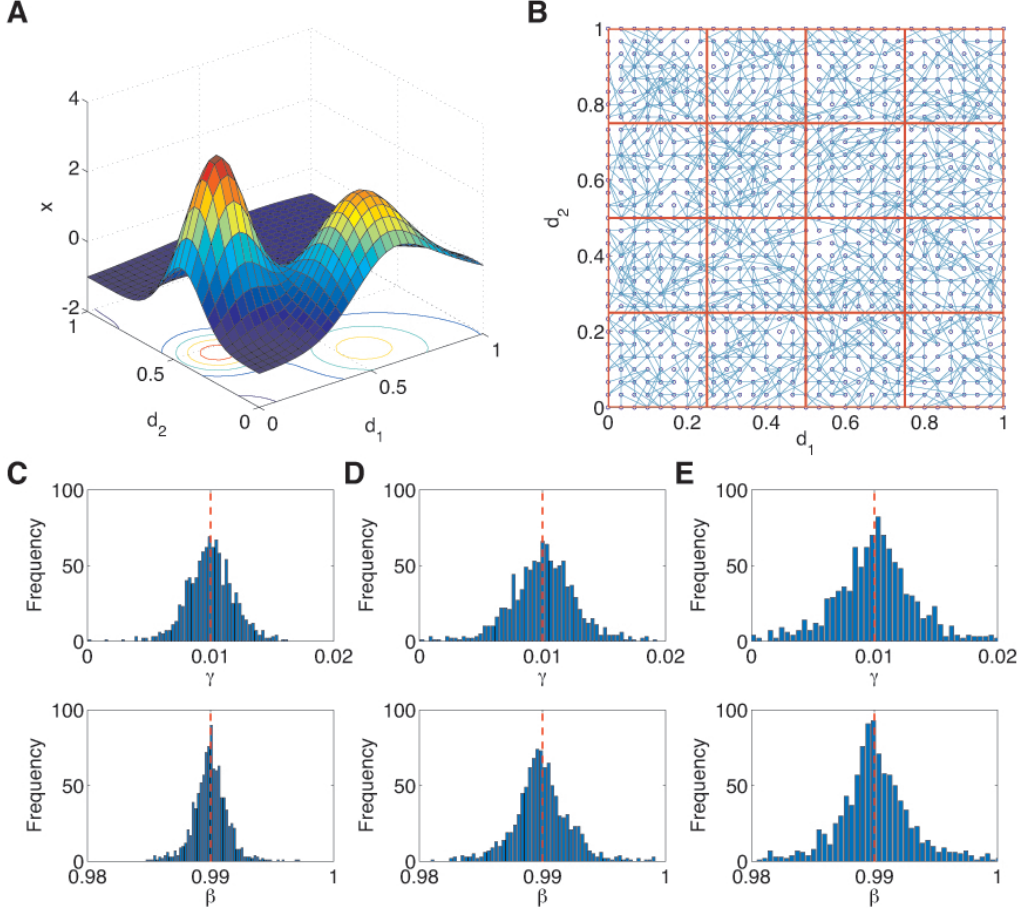

Fig. S1: (A) The exogenous variable  $x$  is a z-scored Gaussian mixture distribution defined over the 2-dimensional geographical space. (B) Each individual is located on a vertex of a grid structure in the geographical space. For an individual  $i$  who is located on  $(d_{1i}, d_{2i})$ ,  $x_i = x(d_{1i}, d_{2i})$ . Each circle represents an individual and the blue lines between individuals are existing social ties in A. Red lines are borders of groups. (C-E) Each histograms is the frequency distribution of  $\gamma$  and  $\beta$  obtained from 2SLS regression throughout 1,000 trials of simulation. Red dashed lines indicate true values of coefficients. To ensure the robustness of the results, we vary the distant-dependency level  $\alpha$  of  $A$  while preserving the connection density of the networks by adjusting  $\rho$ . The ratio of the number of existing links to the number of all possible connections, connection density, is set to  $\sim 0.02$ .  $N = 961$  and  $n = 100$ .  $\alpha = 16$  (C),  $\alpha = 26$  (D) and  $\alpha = 36$  (E). The extent of geographical clustering also affects the level of topological clustering measured by average clustering coefficient, the ratio of the number of connected triads to the number of all possible combinations. Average clustering coefficient of the networks grows from 0.14 to 0.37 as  $\alpha$  increases.

a multidimensional Gaussian mixture distribution. The value of  $x$  affecting individual  $i$  corresponds to  $x$  at  $i$ 's location,  $x_i = f(x; d_{1i}, d_{2i})$  where  $f(x; d_1, d_2) = \sum_{j=1}^{10} \mathcal{N}(\boldsymbol{\mu}_j, \boldsymbol{\Sigma}_j)$  and  $\boldsymbol{\mu}_j \in d_1 \times d_2$  and  $\boldsymbol{\Sigma}_j = cI_2$  share the same geographical space with the individuals.  $\boldsymbol{\mu}_j$  is randomly drawn from a 2-dimensional uniform distribution defined over  $[0, 1] \times [0, 1]$  and  $c$  is drawn from a uniform distribution defined over  $(0, 0.2)$ .  $N \times N$  adjacency matrix  $A$  is an undirected binary network generated by using a stochastic distant-dependent attachment model [4]. The probability that individual  $i$  projects an undirected link to another individual  $j$  is  $\rho e^{-\alpha D_{ij}}$  where  $D_{ij}$  is the Euclidean distance between  $i$  and  $j$ . Non-negative coefficient  $\alpha$  is a factor determining the level of distance dependency and coefficient  $\rho \in [0, 1]$  determines the density of the resulting network. As  $\alpha$  increases the network is more likely to have proximal connections than distant connections.

We simulate the endogenous variable  $\mathbf{y}$  using  $\mathbf{x}$ ,  $A$  and the model equation (1). With a little calculation, we obtain the explicit expression  $\mathbf{y} = (I - \gamma W)^{-1}(\beta \mathbf{x} + \epsilon)$  where  $W_{ij} = \frac{a_{ij}}{\delta_i}$  (there is a slight notational change due to the matrix and vector representation).  $\epsilon$  is drawn from  $\mathcal{N}(0, 0.01^2)$ . Ground truth value of  $\gamma$  is set to 0.01 and, for simplicity,  $\beta = 1 - \gamma = 0.99$ . Our challenge now is to recover  $\beta$  and  $\gamma$  using equations (7) and (8) by observing  $\mathbf{y}$ ,  $\mathbf{x}$  and  $A$ . Each individual is assigned to one of  $n$  ( $n < N$ ) groups whose size is about the same to each other.

Figure S1 shows that 2SLS regression using equations (7) and (8) accurately recover the true values of coefficients in most cases. For networks with different level of geographical and topological clustering, we conduct 1,000 simulations for each setting. Standard deviation of coefficients in the pooled data is 0.0027 ( $\gamma$ ) and 0.0024 ( $\beta$ ) respectively around the true values. In total, more than 95% of individual coefficient estimates exhibit  $p < 0.01$ .

## 5.2 Placebo test

If our procedure is correctly estimating social influence, we would not expect to be able to predict users' emotion using future friends' weather and emotion. Here, we test a placebo model by using the same instrumental variables procedure described above to estimate the effect of *future* friends'

rainfall on users' emotion *today*. We arbitrarily choose  $t + 30$  as a point in time far enough in the future that friends' rainfall then will not be correlated with friends' rainfall at time  $t$ . We then modify the equation in (3) to shift the independent variable forward by 30 days:

$$\bar{y}_{gt} = \theta_t + \bar{f}_g + \beta \bar{x}_{gt} + \gamma \bar{Y}_{g,t+30} + \bar{\epsilon}_{gt}, \quad (11)$$

We conduct instrumental variable regression using  $\bar{X}_{g,t+30}$  as an instrument for  $\bar{Y}_{g,t+30}$ . Tables 13 to 16 report the estimates (with standard errors, t-statistics, 95% confidence intervals, and diagnostic statistics) for the first and second stage of the 2SLS regression. The estimates of  $\gamma$  from the second stage regression are not statistically significant and they are much lower in magnitude than those estimated for the model in equation (3).

### 5.3 Controlling for topic contagion

One concern is that our estimates of emotional contagion are actually estimates of topic contagion. Friends who post more negatively when it rains may be posting about the weather itself, and users may respond with their own statuses about weather. This would not undermine our statistical results on contagion, but it might change our interpretation if we discovered that topics were driving the similarity in word choice by users and friends.

To address this issue, we created a dictionary of weather terms based on a meteorological glossary supplied by NOAA (<http://www.erh.noaa.gov/box/glossary.htm>). We then crowdsourced this dictionary to approximately 100 students, post-docs, and professors asking for additional suggestions. The resulting list is not exhaustive, but we expect it will allow us to detect most status updates that are on a weather-related topic. The full list of terms can be found in Table 17.

Recall that  $U_{it}$  represents the status updates of user  $i$  on day  $t$ , and let  $u_{it}^{(w)}$  be the number of status updates in  $U_{it}$  that contain at least one word from our dictionary of weather terms. If  $u_{it} \neq 0$ , let  $w_{it} = u_{it}^{(w)} / u_{it}$  be the fraction of  $i$ 's status updates related to weather, and let  $\bar{w}_{gt} = \frac{1}{n_g} \sum_{i \in S_g} w_{it}$  be the average over city  $g$ . We can now use this variable to control for the tendency

to post status updates about the weather by adding it to equation (3):

$$\bar{y}_{gt} = \theta_t + \bar{f}_g + \lambda \bar{w}_{gt} + \gamma \bar{Y}_{gt} + \bar{\epsilon}_{gt}. \quad (12)$$

Tables 18 to 21 report the estimates (with standard errors, t-statistics, 95% confidence intervals, and diagnostic statistics) for the first and second stage of the 2SLS regression. The negative estimates for  $\lambda$  suggest that increased usage of weather words is generally associated with decreased emotional expression. However, the relationships are weak and sometimes insignificant, and more importantly, the estimates for the emotional transmission parameter  $\gamma$  remain substantially the same as the estimates from model (3) without controls. These results indicate that posting on the topic of weather is not driving the relationship in use of emotional words between users and their friends.

## 6 Quantifying the total effect of a user on her friends

Consider a user  $j$  and assume she posts a single status update during day  $t$ . For presentation, we consider negative emotions and compare the case in which  $j$ 's status update contains a negative word ( $y_{jt} = 1$ ) versus the case it does not ( $y_{jt} = 0$ ). We estimate the additional number of negative status updates posted by  $j$ 's friends conditional on  $y_{jt} = 1$  versus  $y_{jt} = 0$ .

According to the individual level model (1), the emotional contagion from  $j$  to  $i$  is given by  $c_{ijt} = \gamma a_{ijt} y_{jt} / \delta_{it}$  for each user  $i$  who posted on day  $t$  (we assume that each user  $i$  posted either one or zero status updates). Conditional on  $y_{jt} = 1$  and on  $y_{jt} = 0$  respectively, this term is

$$\begin{aligned} c_{ijt}^{(1)} &= \gamma a_{ijt} / \delta_{it}, \\ c_{ijt}^{(0)} &= 0. \end{aligned}$$

Summing over all users  $i$  who posted on day  $t$ , the total emotional contagion of user  $j$  conditional on  $y_{jt} = 1$  is

$$C_{jt}^{(1)} = \sum_i c_{ijt}^{(1)} = \gamma \sum_i a_{ijt} / \delta_{it},$$

while conditional on  $y_{jt} = 0$  it is  $C_{jt}^{(0)} = 0$ . The difference in number of negative status updates posted by  $j$ 's friends conditional on  $y_{jt} = 1$  versus  $y_{jt} = 0$  can be therefore quantified as

$$F_{jt} = C_{jt}^{(1)} - C_{jt}^{(0)} = \gamma \sum_i a_{ijt} / \delta_{it} = \gamma A_{jt},$$

where  $A_{jt} = \sum_i a_{ijt} / \delta_{it}$  constitutes a measure of how influential user  $j$  is. In words,  $j$ 's cumulative effect on her friends is proportional to the coefficient of emotional contagion  $\gamma$  and her influence  $A_{jt}$ .

Observe that  $A_{jt}$  can be computed exactly for each  $j$  and  $t$ . And note that this measure is increasing in the number of friends (more friends means more people might be influenced) and decreasing in the number of friends those friends have (if a friend has more friends, the user will on average have less influence on that friend).

The average user's effect  $\bar{F}_t$  can be computed as the average individual effect over all  $n$  users

$$\begin{aligned} \bar{F}_t &= \frac{1}{n} \sum_j F_{jt} = \gamma \frac{1}{n} \sum_j A_{jt} = \gamma \frac{1}{n} \sum_j \sum_i a_{ijt} \frac{1}{\delta_{it}} \\ &= \gamma \frac{1}{n} \sum_i \frac{1}{\delta_{it}} \sum_j a_{ijt} = \gamma \frac{1}{n} \sum_i \frac{1}{\delta_{it}} \delta_{it} = \gamma. \end{aligned}$$

The average user's effect  $\bar{F}_t$  and 95% CI for all four choices of emotions (user's positive/negative rate, friends' positive/negative rate) are shown in Table 22, and correspond directly to the estimates of  $\gamma$  in Tables 5 to 8. In other words, the  $\gamma$  coefficients themselves are estimates of the total effect a user has on all her friends.

## 7 How rain affects friends in other cities

Here we compute the cumulative effect that rain in one city has on all friends of users in that city who are in *different* cities. This allows us to answer the question: if it rains in New York, how many additional users in other cities post negative status updates as a result?

Consider the 2SLS model given by equations (9) and (10) for day  $t$  and city  $g$ ,

$$\begin{aligned}\bar{Y}_{gt} &= \theta'_t + \bar{f}'_g + \beta_1 \bar{X}_{gt} + \epsilon'_{gt}, \\ \bar{y}_{gt} &= \theta_t + \bar{f}_g + \gamma \bar{Y}_{gt}^{pred} + \bar{\epsilon}_{gt}.\end{aligned}$$

Suppose that other cities are indexed by  $h \neq g$  and let  $\bar{X}_{gt}^{(h,1)}$ ,  $\bar{Y}_{gt}^{(h,1)}$ ,  $\bar{y}_{gt}^{(h,1)}$  respectively denote  $\bar{X}_{gt}$ ,  $\bar{Y}_{gt}$ ,  $\bar{y}_{gt}$  conditional on  $\bar{x}_{ht} = 1$  (that is, rainfall in city  $h$ ). Similarly, let  $\bar{X}_{gt}^{(h,0)}$ ,  $\bar{Y}_{gt}^{(h,0)}$ ,  $\bar{y}_{gt}^{(h,0)}$  be the same quantities conditional on  $\bar{x}_{ht} = 0$ . Using this notation, we can derive the following relationships:

$$\begin{aligned}\bar{X}_{gt}^{(h,1)} - \bar{X}_{gt}^{(h,0)} &= \sum_{i \in S_h} \frac{1}{n_g} \sum_{j \in S_g} \frac{1}{\delta_{jt}} a_{ijt}, \\ \bar{Y}_{gt}^{(h,1)} - \bar{Y}_{gt}^{(h,0)} &= \beta_1 \left( \bar{X}_{gt}^{(h,1)} - \bar{X}_{gt}^{(h,0)} \right) = \beta_1 \sum_{i \in S_h} \frac{1}{n_g} \sum_{j \in S_g} \frac{1}{\delta_{jt}} a_{ijt}, \\ \bar{y}_{gt}^{(h,1)} - \bar{y}_{gt}^{(h,0)} &= \gamma \beta_1 \left( \bar{X}_{gt}^{(h,1)} - \bar{X}_{gt}^{(h,0)} \right) = \gamma \beta_1 \sum_{i \in S_h} \frac{1}{n_g} \sum_{j \in S_g} \frac{1}{\delta_{jt}} a_{ijt}.\end{aligned}$$

Observe that  $\bar{y}_{gt}^{(h,1)} - \bar{y}_{gt}^{(h,0)}$  is the difference in emotion of the average user in city  $g$  conditional on  $\bar{x}_{ht} = 1$  versus  $\bar{x}_{ht} = 0$ . Assuming that each user posts either one or zero status updates on day  $t$ ,  $n_g(\bar{y}_{gt}^{(h,1)} - \bar{y}_{gt}^{(h,0)})$  is the additional number of negative status updates posted in city  $g$  conditional on  $\bar{x}_{ht} = 1$  versus  $\bar{x}_{ht} = 0$ , where  $n_g$  is the number of users in city.

Fix a day  $t$ , let  $\bar{I}_{ht}$  be the cumulative number of negative status updates posted in all cities different than  $h$  conditional on  $\bar{x}_{ht} = 1$  versus  $\bar{x}_{ht} = 0$ , that is the *indirect* of rain in city  $h$ . This can be computed by summing the effect on each city  $g \neq h$ ,

$$\begin{aligned}\bar{I}_{ht} &= \sum_{g \neq h} n_g \left( \bar{y}_{gt}^{(h,1)} - \bar{y}_{gt}^{(h,0)} \right) = \gamma \beta_1 \sum_{g \neq h} n_g \sum_{i \in S_h} \frac{1}{n_g} \sum_{j \in S_g} \frac{1}{\delta_{jt}} a_{ijt} \\ &= \gamma \beta_1 \sum_{i \in S_h} \sum_{g \neq h} \sum_{j \in S_g} \frac{1}{\delta_{jt}} a_{ijt} = \gamma \beta_1 \sum_{i \in S_h} \sum_{j \notin S_h} \frac{1}{\delta_{jt}} a_{ijt}.\end{aligned}$$

For a user  $i$  in city  $h$ ,  $\sum_{j \notin S_h} a_{ijt}/\delta_{jt}$  is the sum of the inverse degrees of  $i$ 's friend who are in a different city, and represents a measure of  $i$ 's *influence*

outside city  $h$ . The indirect effect or rain  $\bar{I}_{ht}$  is therefore proportional to the total influence from users in city  $h$  to their friends in other cities.

For each city  $h$ , we let  $\bar{I}_h$  be the average of  $\bar{I}_{ht}$  over all days  $t$ .

The confidence interval of  $\bar{I}_h$  is computed from the confidence interval for the product  $\gamma\beta_1$ , as the other terms can be exactly computed. To compute a confidence interval on the product  $\gamma\beta_1$  we cannot simply multiply the estimates of  $\gamma$  and  $\beta_1$  in Table 6 derived from the model in equation (3) using two-stage least-squares regression, because they might be correlated. We therefore use bootstrap sampling by independently generating 100 bootstrap samples of our data set. Each bootstrap sample is generated by first selecting 1180 days uniformly at random with replacement, and then selecting 100 cities uniformly at random with replacement for each of the 1180 selected days. For each bootstrap sample, we estimate the model in equation (3) using two-stage least-squares regression, and we compute the product between  $\beta_1$  (from the first-stage regression) and  $\gamma$  (from the second-stage regression). We then compute the mean and 95% CI of the estimates of  $\gamma\beta_1$  from all bootstrap samples.

Tables 23 and 24 show the *direct* effect  $\bar{D}_h$  (with 95% CI) of rain in city  $h$  on status updates posted by users in that city, computed by multiplying the number of users  $n_h$  by the coefficient  $\beta_1$  from the first stage in the 2SLS regression. The tables also show the *indirect* effect  $\bar{I}_h$  (with 95% CI) for each city  $h$  of rain on status updates posted by users in other cities.

Similar results can be obtained by considering the effect on the number of either positive or negative posts, and using positive or negative emotions as the variable  $\bar{Y}_{gt}$  in the first stage regression. The size and direction of  $\bar{I}_h$  and  $\bar{D}_h$  would depend on the magnitude and sign of  $\gamma\beta_1$  and  $\beta_1$  respectively.

## 8 Tables

| List of US cities and codes |                      |      |                     |      |                    |
|-----------------------------|----------------------|------|---------------------|------|--------------------|
| Code                        | City                 | Code | City                | Code | City               |
| ABQ                         | Albuquerque, NM      | GAR  | Garland, TX         | OKC  | Oklahoma City, OK  |
| ANA                         | Anaheim, CA          | GEU  | Glendale, AZ        | OMA  | Omaha, NE          |
| ANC                         | Anchorage, AK        | GKY  | Arlington, TX       | ORF  | Norfolk, VA        |
| ATL                         | Atlanta, GA          | GSP  | Greensboro, NC      | ORL  | Orlando, FL        |
| AUR                         | Aurora, CO           | HIA  | Hialeah, FL         | PDX  | Portland, OR       |
| AUS                         | Austin, TX           | HND  | Henderson, NV       | PHL  | Philadelphia, PA   |
| AWO                         | Arlington, VA        | HNL  | Honolulu, HI        | PHX  | Phoenix, TX        |
| BFL                         | Bakersfield, CA      | HOU  | Houston, TX         | PIE  | St Petersburg, FL  |
| BHM                         | Birmingham, AL       | HTS  | Huntington, WV      | PIT  | Pittsburgh, PA     |
| BNA                         | Nashville, TN        | ICT  | Wichita, KS         | PLA  | Plano, TX          |
| BOI                         | Boise, ID            | IND  | Indianapolis, IN    | RAL  | Raleigh, NC        |
| BOS                         | Boston, MA           | JAX  | Jacksonville, FL    | RDU  | Durham, NC         |
| BTR                         | Baton Rouge, LA      | JCY  | Jersey City, NJ     | RIV  | Riverside, CA      |
| BUF                         | Buffalo, NY          | LAS  | Las Vegas, NV       | RNO  | Reno, NV           |
| BWI                         | Baltimore, MD        | LAX  | Los Angeles, CA     | ROC  | Rochester, NY      |
| CAK                         | Akron, OH            | LBB  | Lubbock, TX         | SAN  | San Diego, CA      |
| CHD                         | Chandler, AZ         | LEX  | Lexington, KY       | SAT  | San Antonio, TX    |
| CHI                         | Chicago, IL          | LGB  | Long Beach, CA      | SBD  | San Bernardino, CA |
| CHU                         | Chula Vista, CA      | LNK  | Lincoln, NB         | SCK  | Stockton, CA       |
| CLE                         | Cleveland, OH        | LRD  | Laredo, TX          | SDL  | Scottsdale, AZ     |
| CLT                         | Charlotte, NC        | MCI  | Kansas City, MO     | SEA  | Seattle, WA        |
| CMH                         | Columbus, OH         | MEM  | Memphis, TN         | SFO  | San Francisco, CA  |
| COS                         | Colorado Springs, CO | MES  | Mesa, CA            | SJC  | San Jose, CA       |
| CPK                         | Chesapeake, VA       | MGM  | Montgomery, AL      | SMF  | Sacramento, CA     |
| CRP                         | Corpus Christi, TX   | MIA  | Miami, FL           | SNA  | Santa Ana, CA      |
| CVG                         | Cincinnati, OH       | MKE  | Milwaukee, WI       | SNP  | St Paul, MN        |
| DAL                         | Dallas, TX           | MOD  | Modesto, CA         | STL  | St Louis, MO       |
| DEN                         | Denver, CO           | MSN  | Madison, WI         | TOL  | Toledo, OH         |
| DFW                         | Fort Worth, TX       | MSP  | Minneapolis, MN     | TPA  | Tampa, FL          |
| DTT                         | Detroit, MI          | MSY  | New Orleans, LA     | TUL  | Tulsa, OK          |
| ELP                         | El Paso, TX          | NHE  | North Hempstead, NY | TUS  | Tucson, AZ         |
| EWB                         | Newark, NJ           | NYC  | New York, NY        | VIB  | Virginia Beach, VA |
| FAT                         | Fresno, CA           | OAK  | Oakland, CA         | WAS  | Washington, DC     |
| FWA                         | Fort Wayne, IN       |      |                     |      |                    |

Table 1

| Quantity                            | Mean       | Standard Dev. |
|-------------------------------------|------------|---------------|
| Number of users (daily)             | 9,903,993  | 3,447,776     |
| Number of users who updated (daily) | 2,042,996  | 775,162       |
| Number of friendships (daily)       | 52,787,239 | 25,118,462    |

Table 2: For each day in the period of observation (a set of 1180 days from January 2009 to March 2012) all Facebook users that are English-speakers and geolocated within the 100 most populous US cities are included. Assuming that each user posts either one or zero status updates on a day, the average number of status updates per user per day is  $\alpha = 0.206$ .

| Summary of Emotion and Meteorological Variables |        |                    |         |         |
|-------------------------------------------------|--------|--------------------|---------|---------|
|                                                 | Mean   | Standard Deviation | Minimum | Maximum |
| Positive rate                                   | 0.407  | 0.0445             | 0.116   | 0.614   |
| Negative rate                                   | 0.213  | 0.0329             | 0.0388  | 0.440   |
| Weather posts                                   | 0.0653 | 0.0347             | 0       | 0.527   |
| Rainfall indicator                              | 0.257  | 0.437              | 0       | 1       |

Table 3: The summary statistics for each emotional and meteorological variable are computed considering one observation for each city-day pair.

| Summary of Rainfall in each City |          |            |           |          |            |           |          |            |           |          |            |
|----------------------------------|----------|------------|-----------|----------|------------|-----------|----------|------------|-----------|----------|------------|
| City Code                        | Num Days | Rainy Days | City Code | Num Days | Rainy Days | City Code | Num Days | Rainy Days | City Code | Num Days | Rainy Days |
| ABQ                              | 120      | 1180       | CVG       | 379      | 1180       | LEX       | 236      | 1180       | PIT       | 378      | 1180       |
| ANA                              | 424      | 1180       | DAL       | 257      | 1180       | LGB       | 404      | 1180       | PLA       | 386      | 1180       |
| ANC                              | 278      | 1180       | DEN       | 217      | 1180       | LNK       | 274      | 1180       | RAL       | 94       | 1180       |
| ATL                              | 139      | 1180       | DFW       | 350      | 1180       | LRD       | 358      | 1180       | RDU       | 241      | 1180       |
| AUR                              | 236      | 1180       | DTT       | 566      | 1180       | MCI       | 280      | 1180       | RIV       | 84       | 1180       |
| AUS                              | 243      | 1180       | ELP       | 132      | 1180       | MEM       | 131      | 1180       | RNO       | 377      | 1180       |
| AWO                              | 94       | 1180       | EWB       | 217      | 1180       | MES       | 303      | 1180       | ROC       | 113      | 1180       |
| BFL                              | 438      | 1180       | FAT       | 137      | 1180       | MGM       | 102      | 1180       | SAN       | 357      | 1180       |
| BHM                              | 303      | 1180       | FWA       | 148      | 1180       | MIA       | 446      | 1180       | SAT       | 384      | 1180       |
| BNA                              | 207      | 1180       | GAR       | 341      | 1180       | MKE       | 558      | 1180       | SBD       | 402      | 1180       |
| BOI                              | 344      | 1180       | GEU       | 132      | 1180       | MOD       | 132      | 1180       | SCK       | 116      | 1180       |
| BOS                              | 460      | 1180       | GKY       | 389      | 1180       | MSN       | 408      | 1180       | SDL       | 213      | 1180       |
| BTR                              | 420      | 1180       | GSP       | 347      | 1180       | MSP       | 257      | 1180       | SEA       | 519      | 1180       |
| BUF                              | 226      | 1180       | HIA       | 214      | 1180       | MSY       | 450      | 1180       | SFO       | 461      | 1180       |
| BWI                              | 207      | 1180       | HND       | 519      | 1180       | NHE       | 341      | 1180       | SJC       | 370      | 1180       |
| CAK                              | 372      | 1180       | HNL       | 84       | 1180       | NYC       | 523      | 1180       | SMF       | 443      | 1180       |
| CHD                              | 342      | 1180       | HOU       | 373      | 1180       | OAK       | 382      | 1180       | SNA       | 183      | 1180       |
| CHI                              | 243      | 1180       | HTS       | 323      | 1180       | OKC       | 243      | 1180       | SNP       | 177      | 1180       |
| CHU                              | 407      | 1180       | ICT       | 153      | 1180       | OMA       | 444      | 1180       | STL       | 536      | 1180       |
| CLE                              | 131      | 1180       | IND       | 256      | 1180       | ORF       | 299      | 1180       | TOL       | 196      | 1180       |
| CLT                              | 397      | 1180       | JAX       | 267      | 1180       | ORL       | 296      | 1180       | TPA       | 305      | 1180       |
| CMH                              | 390      | 1180       | JCY       | 414      | 1180       | PDX       | 369      | 1180       | TUL       | 334      | 1180       |
| COS                              | 388      | 1180       | LAS       | 283      | 1180       | PHL       | 92       | 1180       | TUS       | 400      | 1180       |
| CPK                              | 365      | 1180       | LAX       | 362      | 1180       | PHX       | 311      | 1180       | VIB       | 320      | 1180       |
| CRP                              | 562      | 1180       | LBB       | 134      | 1180       | PIE       | 154      | 1180       | WAS       | 388      | 1180       |

Table 4

| Emotion measure: positive rate (non rainy days) |             |          |       |                         |         |         |
|-------------------------------------------------|-------------|----------|-------|-------------------------|---------|---------|
| Instrument: binary indicator of rainfall        |             |          |       |                         |         |         |
| FIRST STAGE                                     |             | Standard |       | 95% Confidence Interval |         |         |
| Friends' emotion $\bar{Y}^{(p)}$                | Coefficient | Error    | $t$   | $P >  t $               | Low     | High    |
| Friends' rainfall $\bar{X}$                     | -0.0119     | 0.00207  | -5.75 | 0.000                   | -0.0160 | -.00781 |
| SECOND STAGE                                    |             | Standard |       | 95% Confidence Interval |         |         |
| Users' emotion $\bar{y}^{(p)}$                  | Coefficient | Error    | $t$   | $P >  t $               | Low     | High    |
| Friends' emotion $\bar{Y}^{(p)}$                | 1.752       | 0.122    | 14.39 | 0.000                   | 1.514   | 1.991   |

Table 5: Observations such that  $\bar{x}_{gt} = 0$  are considered (87,700 total observations). The Kleibergen-Paap  $rk$  LM statistic is 25.507 ( $p = 0.0000$ ) suggesting the regression is not underidentified.[3] The Cragg-Donald Wald  $F$  statistic is 324.053, which exceeds the critical thresholds suggested by Stock and Yogo [5] to ensure the instruments are not weak. All statistics are robust to heteroskedasticity, autocorrelation, and clustering.

| Emotion measure: negative rate (non rainy days) |             |          |       |                         |         |        |
|-------------------------------------------------|-------------|----------|-------|-------------------------|---------|--------|
| Instrument: binary indicator of rainfall        |             |          |       |                         |         |        |
| FIRST STAGE                                     |             | Standard |       | 95% Confidence Interval |         |        |
| Friends' emotion $\bar{Y}^{(n)}$                | Coefficient | Error    | $t$   | $P >  t $               | Low     | High   |
| Friends' rainfall $\bar{X}$                     | 0.0116      | 0.00195  | 5.97  | 0.000                   | 0.00776 | 0.0155 |
| SECOND STAGE                                    |             | Standard |       | 95% Confidence Interval |         |        |
| Users' emotion $\bar{y}^{(n)}$                  | Coefficient | Error    | $t$   | $P >  t $               | Low     | High   |
| Friends' emotion $\bar{Y}^{(n)}$                | 1.288       | 0.0486   | 26.53 | 0.000                   | 1.193   | 1.383  |

Table 6: Observations such that  $\bar{x}_{gt} = 0$  are considered (87,700 total observations). The Kleibergen-Paap  $rk$  LM statistic is 24.598 ( $p = 0.0000$ ) suggesting the regression is not underidentified.[3] The Cragg-Donald Wald  $F$  statistic is 505.398, which exceeds the critical thresholds suggested by Stock and Yogo [5] to ensure the instruments are not weak. All statistics are robust to heteroskedasticity, autocorrelation, and clustering.

| How friends' positive rate affects users' negative rate (non rainy days) |             |          |       |           |                         |          |
|--------------------------------------------------------------------------|-------------|----------|-------|-----------|-------------------------|----------|
| Instrument: binary indicator of rainfall                                 |             |          |       |           |                         |          |
| FIRST STAGE                                                              |             | Standard |       |           | 95% Confidence Interval |          |
| Friends' emotion $\bar{Y}^{(p)}$                                         | Coefficient | Error    | $t$   | $P >  t $ | Low                     | High     |
| Friends' rainfall $\bar{X}$                                              | -0.0119     | 0.00207  | -5.75 | 0.000     | -0.0160                 | -0.00781 |
| SECOND STAGE                                                             |             | Standard |       |           | 95% Confidence Interval |          |
| User' emotion $\bar{y}^{(n)}$                                            | Coefficient | Error    | $t$   | $P >  t $ | Low                     | High     |
| Friends' emotion $\bar{Y}^{(p)}$                                         | -1.255      | 0.227    | -5.52 | 0.000     | -1.701                  | -0.809   |

Table 7: Observations such that  $\bar{x}_{gt} = 0$  are considered (87,700 total observations). The Kleibergen-Paap  $rk$  LM statistic is 25.507 ( $p = 0.0000$ ) suggesting the regression is not underidentified.[3] TheCragg-Donald Wald  $F$  statistic is 324.053, which exceeds the critical thresholds suggested by Stock and Yogo [5] to ensure the instruments are not weak. All statistics are robust to heteroskedasticity, autocorrelation, and clustering.

| How friends' negative rate affects users' positive rate (non rainy days) |             |          |       |           |                         |        |
|--------------------------------------------------------------------------|-------------|----------|-------|-----------|-------------------------|--------|
| Instrument: binary indicator of rainfall                                 |             |          |       |           |                         |        |
| FIRST STAGE                                                              |             | Standard |       |           | 95% Confidence Interval |        |
| Friends' emotion $\bar{Y}^{(n)}$                                         | Coefficient | Error    | $t$   | $P >  t $ | Low                     | High   |
| Friends' rainfall $\bar{X}$                                              | 0.0116      | 0.00195  | 5.97  | 0.000     | 0.00776                 | 0.0155 |
| SECOND STAGE                                                             |             | Standard |       |           | 95% Confidence Interval |        |
| User' emotion $\bar{y}^{(p)}$                                            | Coefficient | Error    | $t$   | $P >  t $ | Low                     | High   |
| Friends' emotion $\bar{Y}^{(n)}$                                         | -1.798      | 0.271    | -6.62 | 0.000     | -2.330                  | -1.266 |

Table 8: Observations such that  $\bar{x}_{gt} = 0$  are considered (87,700 total observations). The Kleibergen-Paap  $rk$  LM statistic is 24.598 ( $p = 0.0000$ ) suggesting the regression is not underidentified.[3] TheCragg-Donald Wald  $F$  statistic is 505.398, which exceeds the critical thresholds suggested by Stock and Yogo [5] to ensure the instruments are not weak. All statistics are robust to heteroskedasticity, autocorrelation, and clustering.

| Emotion measure: positive rate (rainy days) |             |          |       |           |                         |          |
|---------------------------------------------|-------------|----------|-------|-----------|-------------------------|----------|
| Instrument: binary indicator of rainfall    |             |          |       |           |                         |          |
| FIRST STAGE                                 |             | Standard |       |           | 95% Confidence Interval |          |
| Friends' emotion $\bar{Y}^{(p)}$            | Coefficient | Error    | $t$   | $P >  t $ | Low                     | High     |
| Friends' rainfall $\bar{X}$                 | -0.00985    | 0.00268  | -3.68 | 0.000     | -0.0152                 | -0.00454 |
| SECOND STAGE                                |             | Standard |       |           | 95% Confidence Interval |          |
| Users' emotion $\bar{y}^{(p)}$              | Coefficient | Error    | $t$   | $P >  t $ | Low                     | High     |
| Friends' emotion $\bar{Y}^{(p)}$            | 1.794       | 0.233    | 7.70  | 0.000     | 1.338                   | 2.251    |

Table 9: Observations such that  $\bar{x}_{gt} = 1$  are considered (30,300 total observations). The Kleibergen-Paap  $rk$  LM statistic is 13.531 ( $p = 0.0002$ ) suggesting the regression is not underidentified.[3] The Cragg-Donald Wald  $F$  statistic is 78.189, which exceeds the critical thresholds suggested by Stock and Yogo [5] to ensure the instruments are not weak. All statistics are robust to heteroskedasticity, autocorrelation, and clustering.

| Emotion measure: negative rate (rainy days) |             |          |       |           |                         |        |
|---------------------------------------------|-------------|----------|-------|-----------|-------------------------|--------|
| Instrument: binary indicator of rainfall    |             |          |       |           |                         |        |
| FIRST STAGE                                 |             | Standard |       |           | 95% Confidence Interval |        |
| Friends' emotion $\bar{Y}^{(n)}$            | Coefficient | Error    | $t$   | $P >  t $ | Low                     | High   |
| Friends' rainfall $\bar{X}$                 | 0.00973     | 0.00281  | 3.47  | 0.001     | 0.00416                 | 0.0153 |
| SECOND STAGE                                |             | Standard |       |           | 95% Confidence Interval |        |
| Users' emotion $\bar{y}^{(n)}$              | Coefficient | Error    | $t$   | $P >  t $ | Low                     | High   |
| Friends' emotion $\bar{Y}^{(n)}$            | 1.473       | 0.134    | 10.97 | 0.000     | 1.210                   | 1.736  |

Table 10: Observations such that  $\bar{x}_{gt} = 1$  are considered (30,300 total observations). The Kleibergen-Paap  $rk$  LM statistic is 11.333 ( $p = 0.0008$ ) suggesting the regression is not underidentified.[3] The Cragg-Donald Wald  $F$  statistic is 102.297, which exceeds the critical thresholds suggested by Stock and Yogo [5] to ensure the instruments are not weak. All statistics are robust to heteroskedasticity, autocorrelation, and clustering.

| How friends' positive rate affects users' negative rate (rainy days) |             |          |       |                         |         |          |
|----------------------------------------------------------------------|-------------|----------|-------|-------------------------|---------|----------|
| Instrument: binary indicator of rainfall                             |             |          |       |                         |         |          |
| FIRST STAGE                                                          |             | Standard |       | 95% Confidence Interval |         |          |
| Friends' emotion $\bar{Y}^{(p)}$                                     | Coefficient | Error    | $t$   | $P >  t $               | Low     | High     |
| Friends' rainfall $\bar{X}$                                          | -0.00985    | 0.00268  | -3.68 | 0.000                   | -0.0152 | -0.00454 |
| SECOND STAGE                                                         |             | Standard |       | 95% Confidence Interval |         |          |
| User' emotion $\bar{y}^{(n)}$                                        | Coefficient | Error    | $t$   | $P >  t $               | Low     | High     |
| Friends' emotion $\bar{Y}^{(p)}$                                     | -1.456      | 0.475    | -3.06 | 0.002                   | -2.387  | -0.524   |

Table 11: Observations such that  $\bar{x}_{gt} = 1$  are considered (30,300 total observations). The Kleibergen-Paap  $rk$  LM statistic is 13.531 ( $p = 0.0002$ ) suggesting the regression is not underidentified.[3] TheCragg-Donald Wald  $F$  statistic is 78.189, which exceeds the critical thresholds suggested by Stock and Yogo [5] to ensure the instruments are not weak. All statistics are robust to heteroskedasticity, autocorrelation, and clustering.

| How friends' negative rate affects users' positive rate (rainy days) |             |          |       |                         |         |        |
|----------------------------------------------------------------------|-------------|----------|-------|-------------------------|---------|--------|
| Instrument: binary indicator of rainfall                             |             |          |       |                         |         |        |
| FIRST STAGE                                                          |             | Standard |       | 95% Confidence Interval |         |        |
| Friends' emotion $\bar{Y}^{(n)}$                                     | Coefficient | Error    | $t$   | $P >  t $               | Low     | High   |
| Friends' rainfall $\bar{X}$                                          | 0.00973     | 0.00281  | 3.47  | 0.001                   | 0.00416 | 0.0153 |
| SECOND STAGE                                                         |             | Standard |       | 95% Confidence Interval |         |        |
| User' emotion $\bar{y}^{(p)}$                                        | Coefficient | Error    | $t$   | $P >  t $               | Low     | High   |
| Friends' emotion $\bar{Y}^{(n)}$                                     | -1.816      | 0.550    | -3.30 | 0.001                   | -2.895  | -0.738 |

Table 12: Observations such that  $\bar{x}_{gt} = 1$  are considered (30,300 total observations). The Kleibergen-Paap  $rk$  LM statistic is 11.333 ( $p = 0.0008$ ) suggesting the regression is not underidentified.[3] TheCragg-Donald Wald  $F$  statistic is 102.297, which exceeds the critical thresholds suggested by Stock and Yogo [5] to ensure the instruments are not weak. All statistics are robust to heteroskedasticity, autocorrelation, and clustering.

| Model in Equation (11) (non rainy days)                                   |             |          |       |           |                         |          |
|---------------------------------------------------------------------------|-------------|----------|-------|-----------|-------------------------|----------|
| Emotion measure: positive rate - Instrument: binary indicator of rainfall |             |          |       |           |                         |          |
| FIRST STAGE                                                               |             | Standard |       |           | 95% Confidence Interval |          |
| Friends' emotion $\bar{Y}_{t+30}^{(p)}$                                   | Coefficient | Error    | $t$   | $P >  t $ | Low                     | High     |
| Friends' rainfall $\bar{X}_{t+30}$                                        | -0.0118     | 0.00191  | -6.19 | 0.000     | -0.0156                 | -0.00804 |
| SECOND STAGE                                                              |             | Standard |       |           | 95% Confidence Interval |          |
| Users' emotion $\bar{y}^{(p)}$                                            | Coefficient | Error    | $t$   | $P >  t $ | Low                     | High     |
| Friends' emotion $\bar{Y}_{t+30}^{(p)}$                                   | -0.112      | 0.177    | -0.63 | 0.526     | -0.459                  | 0.235    |

Table 13: Observations such that  $\bar{x}_{gt} = 0$  and  $\bar{x}_{g,t+30} = 0$  are considered (67,493 total observations). The Kleibergen-Paap  $rk$  LM statistic is 28.711 ( $p = 0.0000$ ) suggesting the regression is not underidentified.[3] The Cragg-Donald Wald  $F$  statistic is 265.910, which exceeds the critical thresholds suggested by Stock and Yogo [5] to ensure the instruments are not weak. All statistics are robust to heteroskedasticity, autocorrelation, and clustering.

| Model in Equation (11) (non rainy days)                                   |             |          |       |           |                         |        |
|---------------------------------------------------------------------------|-------------|----------|-------|-----------|-------------------------|--------|
| Emotion measure: negative rate - Instrument: binary indicator of rainfall |             |          |       |           |                         |        |
| FIRST STAGE                                                               |             | Standard |       |           | 95% Confidence Interval |        |
| Friends' emotion $\bar{Y}_{t+30}^{(n)}$                                   | Coefficient | Error    | $t$   | $P >  t $ | Low                     | High   |
| Friends' rainfall $\bar{X}_{t+30}$                                        | 0.0120      | 0.00188  | 6.42  | 0.000     | 0.00832                 | 0.0158 |
| SECOND STAGE                                                              |             | Standard |       |           | 95% Confidence Interval |        |
| Users' emotion $\bar{y}^{(n)}$                                            | Coefficient | Error    | $t$   | $P >  t $ | Low                     | High   |
| Friends' emotion $\bar{Y}_{t+30}^{(n)}$                                   | -0.185      | 0.126    | -1.46 | 0.143     | -0.432                  | 0.0627 |

Table 14: Observations such that  $\bar{x}_{gt} = 0$  and  $\bar{x}_{g,t+30} = 0$  are considered (67,493 total observations). The Kleibergen-Paap  $rk$  LM statistic is 26.552 ( $p = 0.0000$ ) suggesting the regression is not underidentified.[3] The Cragg-Donald Wald  $F$  statistic is 458.685, which exceeds the critical thresholds suggested by Stock and Yogo [5] to ensure the instruments are not weak. All statistics are robust to heteroskedasticity, autocorrelation, and clustering.

| Model in Equation (11) (non rainy days)                                                   |             |          |       |           |                         |          |
|-------------------------------------------------------------------------------------------|-------------|----------|-------|-----------|-------------------------|----------|
| Friends' positive rate to users' negative rate - Instrument: binary indicator of rainfall |             |          |       |           |                         |          |
| FIRST STAGE                                                                               |             | Standard |       |           | 95% Confidence Interval |          |
| Friends' emotion $\bar{Y}_{t+30}^{(p)}$                                                   | Coefficient | Error    | $t$   | $P >  t $ | Low                     | High     |
| Friends' rainfall $\bar{X}_{t+30}$                                                        | -0.0118     | 0.00191  | -6.19 | 0.000     | -0.0156                 | -0.00804 |
| SECOND STAGE                                                                              |             | Standard |       |           | 95% Confidence Interval |          |
| User' emotion $\bar{y}^{(n)}$                                                             | Coefficient | Error    | $t$   | $P >  t $ | Low                     | High     |
| Friends' emotion $\bar{Y}_{t+30}^{(p)}$                                                   | 0.188       | 0.121    | 1.55  | 0.120     | -0.0493                 | 0.425    |

Table 15: Observations such that  $\bar{x}_{gt} = 0$  and  $\bar{x}_{g,t+30} = 0$  are considered (67,493 total observations). The Kleibergen-Paap  $rk$  LM statistic is 28.711 ( $p = 0.0000$ ) suggesting the regression is not underidentified.[3] TheCragg-Donald Wald  $F$  statistic is 265.910, which exceeds the critical thresholds suggested by Stock and Yogo [5] to ensure the instruments are not weak. All statistics are robust to heteroskedasticity, autocorrelation, and clustering.

| Model in Equation (11) (non rainy days)                                                   |             |          |      |           |                         |        |
|-------------------------------------------------------------------------------------------|-------------|----------|------|-----------|-------------------------|--------|
| Friends' negative rate to users' positive rate - Instrument: binary indicator of rainfall |             |          |      |           |                         |        |
| FIRST STAGE                                                                               |             | Standard |      |           | 95% Confidence Interval |        |
| Friends' emotion $\bar{Y}_{t+30}^{(n)}$                                                   | Coefficient | Error    | $t$  | $P >  t $ | Low                     | High   |
| Friends' rainfall $\bar{X}_{t+30}$                                                        | 0.0120      | 0.00188  | 6.42 | 0.000     | 0.00832                 | 0.0158 |
| SECOND STAGE                                                                              |             | Standard |      |           | 95% Confidence Interval |        |
| User' emotion $\bar{y}^{(p)}$                                                             | Coefficient | Error    | $t$  | $P >  t $ | Low                     | High   |
| Friends' emotion $\bar{Y}_{t+30}^{(n)}$                                                   | 0.110       | 0.172    | 0.64 | 0.521     | -0.226                  | 0.447  |

Table 16: Observations such that  $\bar{x}_{gt} = 0$  and  $\bar{x}_{g,t+30} = 0$  are considered (67,493 total observations). The Kleibergen-Paap  $rk$  LM statistic is 26.552 ( $p = 0.0000$ ) suggesting the regression is not underidentified.[3] TheCragg-Donald Wald  $F$  statistic is 458.685, which exceeds the critical thresholds suggested by Stock and Yogo [5] to ensure the instruments are not weak. All statistics are robust to heteroskedasticity, autocorrelation, and clustering.

---

aerovane air airstream altocumulus altostratus anemometer anemometers anticyclone  
anticyclones arctic arid aridity atmosphere atmospheric autumn autumnal balmy  
baroclinic barometer barometers barometric blizzard blizzards blustering blustery  
blustery breeze breezes breezy brisk calm celsius chill chilled chillier chilliest  
chilly chinook cirrocumulus cirrostratus cirrus climate climates cloud cloudburst  
cloudbursts cloudier cloudiest clouds cloudy cold colder coldest condensation contrail  
contrails cool cooled cooling cools cumulonimbus cumulus cyclone cyclones damp damp  
damper damper dampest dampest degree degrees deluge dew dews dewy doppler downburst  
downbursts downdraft downdrafts downpour downpours dried drier dries driest drizzle  
drizzled drizzles drizzly drought droughts dry dryline fall fahrenheit flood flooded  
flooding floods flurries flurry fog fogbow fogbows fogged fogging foggy fogs forecast  
forecasted forecasting forecasts freeze freezes freezing frigid frost frostier  
frostiest frosts frosty froze frozen gale gales galoshes gust gusting gusts gusty  
haboob haboobs hail hailed hailing hails haze hazes hazy heat heated heating heats  
hoarfrost hot hotter hottest humid humidity hurricane hurricanes ice iced ices icing  
icy inclement landspout landspouts lightning lightnings macroburst macrobursts maelstrom  
mercury meteorologic meteorologist meteorologists meteorology microburst microbursts  
microclimate microclimates millibar millibars mist misted mists misty moist moisture  
monsoon monsoons mugginess muggy nexrad nippy NOAA nor'easter nor'easters noreaster  
noreasters overcast ozone parched parching pollen precipitate precipitated precipitates  
precipitating precipitation psychrometer radar rain rainboots rainbow rainbows raincoat  
raincoats rained rainfall rainier rainiest raining rains rainy sandstorm sandstorms  
scorcher scorching searing shower showering showers skiff sleet slicker slickers slush  
slushy smog smoggier smoggiest smoggy snow snowed snowier snowiest snowing snowmageddon  
snowpocalypse snows snowy spring sprinkle sprinkles sprinkling squall squalls squally  
storm stormed stormier stormiest storming storms stormy stratocumulus stratus  
subtropical summer summery sun sunnier sunniest sunny temperate temperature tempest thaw  
thawed thawing thaws thermometer thunder thundered thundering thunders thunderstorm  
thunderstorms tornadic tornado tornadoes tropical troposphere tsunami turbulent twister  
twisters typhoon typhoons umbrella umbrellas vane warm warmed warming warms warmth  
waterspout waterspouts weather wet wetter wettest wind windchill windchills windier  
windiest windspeed windy winter wintry wintry

---

Table 17: Terms used to identify status updates on the topic of weather.

| Model in Equation (12) (non rainy days)                                   |             |          |        |           |                         |          |
|---------------------------------------------------------------------------|-------------|----------|--------|-----------|-------------------------|----------|
| Emotion measure: positive rate - Instrument: binary indicator of rainfall |             |          |        |           |                         |          |
| FIRST STAGE                                                               |             | Standard |        |           | 95% Confidence Interval |          |
| Friends' emotion $\bar{Y}^{(p)}$                                          | Coefficient | Error    | $t$    | $P >  t $ | Low                     | High     |
| Friends' rainfall $\bar{X}$                                               | -0.00888    | 0.00199  | -4.46  | 0.000     | -0.0128                 | -0.00492 |
| Users' weather rate $\bar{w}$                                             | -0.0186     | 0.00322  | -5.78  | 0.000     | -0.0250                 | -0.0122  |
| SECOND STAGE                                                              |             | Standard |        |           | 95% Confidence Interval |          |
| Users' emotion $\bar{y}^{(p)}$                                            | Coefficient | Error    | $t$    | $P >  t $ | Low                     | High     |
| Friends' emotion $\bar{Y}^{(p)}$                                          | 1.205       | 0.0974   | 12.37  | 0.000     | 1.0140                  | 1.396    |
| Users' weather rate $\bar{w}$                                             | -0.0399     | 0.00301  | -13.25 | 0.000     | -0.0458                 | -0.0340  |

Table 18: Observations such that  $\bar{x}_{gt} = 0$  are considered (87,700 total observations). The Kleibergen-Paap  $rk$  LM statistic is 17.750 ( $p = 0.0000$ ) suggesting the regression is not underidentified.[3] The Cragg-Donald Wald  $F$  statistic is 169.315, which exceeds the critical thresholds suggested by Stock and Yogo [5] to ensure the instruments are not weak. All statistics are robust to heteroskedasticity, autocorrelation, and clustering.

| Model in Equation (12) (non rainy days)                                   |             |          |       |                         |         |          |
|---------------------------------------------------------------------------|-------------|----------|-------|-------------------------|---------|----------|
| Emotion measure: negative rate - Instrument: binary indicator of rainfall |             |          |       |                         |         |          |
| FIRST STAGE                                                               |             | Standard |       | 95% Confidence Interval |         |          |
| Friends' emotion $\bar{Y}^{(n)}$                                          | Coefficient | Error    | $t$   | $P >  t $               | Low     | High     |
| Friends' rainfall $\bar{X}$                                               | 0.00749     | 0.00175  | 4.29  | 0.000                   | 0.00403 | 0.0110   |
| Users' weather rate $\bar{w}$                                             | 0.0252      | 0.00496  | 5.09  | 0.000                   | 0.0154  | 0.0351   |
| SECOND STAGE                                                              |             | Standard |       | 95% Confidence Interval |         |          |
| Users' emotion $\bar{y}^{(n)}$                                            | Coefficient | Error    | $t$   | $P >  t $               | Low     | High     |
| Friends' emotion $\bar{Y}^{(n)}$                                          | 1.509       | 0.0986   | 15.30 | 0.000                   | 1.315   | 1.702    |
| Users' weather rate $\bar{w}$                                             | -0.0157     | 0.00305  | -5.14 | 0.000                   | -0.0217 | -0.00971 |

Table 19: Observations such that  $\bar{x}_{gt} = 0$  are considered (87,700 total observations). The Kleibergen-Paap  $rk$  LM statistic is 15.799 ( $p = 0.0001$ ) suggesting the regression is not underidentified.[3] The Cragg-Donald Wald  $F$  statistic is 199.681, which exceeds the critical thresholds suggested by Stock and Yogo [5] to ensure the instruments are not weak. All statistics are robust to heteroskedasticity, autocorrelation, and clustering.

| Model in Equation (12) (non rainy days)                                                   |             |          |       |           |                         |          |
|-------------------------------------------------------------------------------------------|-------------|----------|-------|-----------|-------------------------|----------|
| Friends' positive rate to users' negative rate - Instrument: binary indicator of rainfall |             |          |       |           |                         |          |
| FIRST STAGE                                                                               |             | Standard |       |           | 95% Confidence Interval |          |
| Friends' emotion $\bar{Y}^{(p)}$                                                          | Coefficient | Error    | $t$   | $P >  t $ | Low                     | High     |
| Friends' rainfall $\bar{X}$                                                               | -0.00888    | 0.00199  | -4.46 | 0.000     | -0.0128                 | -0.00492 |
| Users' weather rate $\bar{w}$                                                             | -0.0186     | 0.00322  | -5.78 | 0.000     | -0.0250                 | -0.0122  |
| SECOND STAGE                                                                              |             | Standard |       |           | 95% Confidence Interval |          |
| User' emotion $\bar{y}^{(n)}$                                                             | Coefficient | Error    | $t$   | $P >  t $ | Low                     | High     |
| Friends' emotion $\bar{Y}^{(p)}$                                                          | -1.274      | 0.302    | -4.22 | 0.000     | -1.866                  | -0.681   |
| Users' weather rate $\bar{w}$                                                             | -0.00134    | 0.0113   | -0.12 | 0.905     | -0.0234                 | 0.0207   |

Table 20: Observations such that  $\bar{x}_{gt} = 0$  are considered (87,700 total observations). The Kleibergen-Paap  $rk$  LM statistic is 17.750 ( $p = 0.0000$ ) suggesting the regression is not underidentified.[3] TheCragg-Donald Wald  $F$  statistic is 169.315, which exceeds the critical thresholds suggested by Stock and Yogo [5] to ensure the instruments are not weak. All statistics are robust to heteroskedasticity, autocorrelation, and clustering.

| Model in Equation (12) (non rainy days)                                                   |             |          |       |           |                         |         |
|-------------------------------------------------------------------------------------------|-------------|----------|-------|-----------|-------------------------|---------|
| Friends' negative rate to users' positive rate - Instrument: binary indicator of rainfall |             |          |       |           |                         |         |
| FIRST STAGE                                                                               |             | Standard |       |           | 95% Confidence Interval |         |
| Friends' emotion $\bar{Y}^{(n)}$                                                          | Coefficient | Error    | $t$   | $P >  t $ | Low                     | High    |
| Friends' rainfall $\bar{X}$                                                               | 0.00749     | 0.00175  | 4.29  | 0.000     | 0.00403                 | 0.0110  |
| Users' weather rate $\bar{w}$                                                             | 0.0252      | 0.00496  | 5.09  | 0.000     | 0.0154                  | 0.0351  |
| SECOND STAGE                                                                              |             | Standard |       |           | 95% Confidence Interval |         |
| User' emotion $\bar{y}^{(p)}$                                                             | Coefficient | Error    | $t$   | $P >  t $ | Low                     | High    |
| Friends' emotion $\bar{Y}^{(n)}$                                                          | -1.427      | 0.368    | -3.88 | 0.000     | -2.149                  | -0.706  |
| Users' weather rate $\bar{w}$                                                             | -0.0264     | 0.0150   | -1.76 | 0.078     | -0.0557                 | 0.00300 |

Table 21: Observations such that  $\bar{x}_{gt} = 0$  are considered (87,700 total observations). The Kleibergen-Paap  $rk$  LM statistic is 15.799 ( $p = 0.0001$ ) suggesting the regression is not underidentified.[3] TheCragg-Donald Wald  $F$  statistic is 199.681, which exceeds the critical thresholds suggested by Stock and Yogo [5] to ensure the instruments are not weak. All statistics are robust to heteroskedasticity, autocorrelation, and clustering.

---

Average user emotional contagion effect – estimates and 95% CI

---

| User's emotion | Friend's emotion | $\bar{D}_t$ | Lo95%  | Hi95%  |
|----------------|------------------|-------------|--------|--------|
| Positive rate  | Positive rate    | 1.752       | 1.514  | 1.991  |
| Negative rate  | Negative rate    | 1.288       | 1.193  | 1.383  |
| Positive rate  | Negative rate    | -1.255      | -1.701 | -0.809 |
| Negative rate  | Positive rate    | -1.798      | -2.330 | -1.266 |

---

Table 22

| Indirect and direct effect of rain in a city – estimates and 95% CI<br>(Number of negative posts) |                                |                 |        |        |               |         |         |
|---------------------------------------------------------------------------------------------------|--------------------------------|-----------------|--------|--------|---------------|---------|---------|
| City Code                                                                                         | Population<br>(US Census 2010) | Indirect effect |        |        | Direct effect |         |         |
|                                                                                                   |                                | $\bar{I}_g$     | Lo95%  | Hi95%  | $\bar{D}_g$   | Lo95%   | Hi95%   |
| NYC                                                                                               | 8175133                        | 712.14          | 626.23 | 806.32 | 1550.42       | 1023.81 | 2071.68 |
| LAX                                                                                               | 3792621                        | 666.96          | 586.5  | 755.16 | 1136.34       | 750.37  | 1518.38 |
| CHI                                                                                               | 2695598                        | 573.32          | 504.16 | 649.14 | 1637.96       | 1081.62 | 2188.65 |
| WAS                                                                                               | 601723                         | 494.37          | 434.73 | 559.75 | 878.38        | 580.04  | 1173.7  |
| ATL                                                                                               | 420003                         | 477.59          | 419.98 | 540.75 | 992.6         | 655.46  | 1326.32 |
| DAL                                                                                               | 1197816                        | 445.36          | 391.63 | 504.25 | 714.63        | 471.9   | 954.89  |
| HOU                                                                                               | 2100263                        | 352.2           | 309.71 | 398.77 | 881.18        | 581.88  | 1177.44 |
| SAN                                                                                               | 1307402                        | 299.02          | 262.95 | 338.56 | 536.04        | 353.97  | 716.26  |
| AUS                                                                                               | 790390                         | 283.22          | 249.05 | 320.67 | 443.31        | 292.74  | 592.35  |
| SFO                                                                                               | 805235                         | 278.62          | 245.01 | 315.47 | 419.23        | 276.84  | 560.18  |
| ORL                                                                                               | 238300                         | 262.76          | 231.06 | 297.51 | 530.92        | 350.59  | 709.42  |
| PHX                                                                                               | 1445632                        | 252.38          | 221.94 | 285.76 | 432.45        | 285.57  | 577.85  |
| PHL                                                                                               | 1526006                        | 250.07          | 219.9  | 283.14 | 831.29        | 548.94  | 1110.77 |
| BOS                                                                                               | 617594                         | 226.16          | 198.87 | 256.07 | 678.99        | 448.37  | 907.27  |
| LAS                                                                                               | 583756                         | 215.53          | 189.53 | 244.03 | 367.55        | 242.71  | 491.12  |
| TPA                                                                                               | 335709                         | 203.99          | 179.38 | 230.96 | 407.76        | 269.26  | 544.85  |
| CLT                                                                                               | 731424                         | 202.33          | 177.92 | 229.09 | 441.28        | 291.4   | 589.65  |
| BWI                                                                                               | 620961                         | 201.65          | 177.32 | 228.32 | 510.88        | 337.36  | 682.64  |
| SEA                                                                                               | 608660                         | 199.65          | 175.57 | 226.05 | 450.34        | 297.38  | 601.75  |
| MSP                                                                                               | 382578                         | 189.01          | 166.21 | 214    | 487.64        | 322.01  | 651.58  |
| MIA                                                                                               | 399457                         | 184.1           | 161.89 | 208.44 | 511.4         | 337.7   | 683.34  |
| BNA                                                                                               | 601222                         | 181.93          | 159.98 | 205.99 | 340.53        | 224.87  | 455.02  |
| SAT                                                                                               | 1327407                        | 180.27          | 158.52 | 204.11 | 402.74        | 265.95  | 538.14  |
| DEN                                                                                               | 600158                         | 174.49          | 153.44 | 197.57 | 342.77        | 226.35  | 458.01  |
| DTT                                                                                               | 713777                         | 169.29          | 148.86 | 191.67 | 722.21        | 476.91  | 965.02  |
| CMH                                                                                               | 787033                         | 165.41          | 145.45 | 187.28 | 385.78        | 254.75  | 515.48  |
| VIB                                                                                               | 437994                         | 164.3           | 144.48 | 186.03 | 261.33        | 172.57  | 349.19  |
| RAL                                                                                               | 403892                         | 155.61          | 136.84 | 176.19 | 331.11        | 218.64  | 442.43  |
| PDX                                                                                               | 583776                         | 151.09          | 132.86 | 171.07 | 368.13        | 243.1   | 491.9   |
| IND                                                                                               | 820445                         | 145.44          | 127.89 | 164.67 | 426.14        | 281.4   | 569.42  |
| STL                                                                                               | 319294                         | 140.84          | 123.85 | 159.47 | 428.03        | 282.65  | 571.94  |
| PIT                                                                                               | 305704                         | 138.34          | 121.65 | 156.63 | 423.86        | 279.89  | 566.36  |
| JAX                                                                                               | 821784                         | 128.47          | 112.97 | 145.46 | 313.3         | 206.88  | 418.63  |
| CVG                                                                                               | 296943                         | 125.75          | 110.58 | 142.38 | 349.55        | 230.82  | 467.07  |
| MKE                                                                                               | 594833                         | 123.44          | 108.55 | 139.76 | 356.36        | 235.32  | 476.17  |
| CLE                                                                                               | 396815                         | 121.64          | 106.97 | 137.73 | 290.14        | 191.59  | 387.69  |
| MCI                                                                                               | 459787                         | 121.57          | 106.9  | 137.64 | 361.38        | 238.64  | 482.88  |
| MSY                                                                                               | 343829                         | 119.4           | 104.99 | 135.18 | 217.86        | 143.86  | 291.1   |
| DFW                                                                                               | 741206                         | 114.47          | 100.66 | 129.6  | 143.96        | 95.06   | 192.36  |
| SMF                                                                                               | 466488                         | 109.26          | 96.08  | 123.7  | 259.26        | 171.2   | 346.42  |
| MEM                                                                                               | 646889                         | 101.05          | 88.86  | 114.41 | 281.99        | 186.21  | 376.8   |
| COS                                                                                               | 416427                         | 85.02           | 74.76  | 96.26  | 164.61        | 108.7   | 219.95  |
| TUS                                                                                               | 520116                         | 85              | 74.74  | 96.24  | 183.67        | 121.29  | 245.42  |
| OKC                                                                                               | 579999                         | 82.09           | 72.19  | 92.95  | 197.24        | 130.25  | 263.55  |
| BHM                                                                                               | 212237                         | 80.15           | 70.48  | 90.74  | 206.74        | 136.52  | 276.25  |
| ROC                                                                                               | 210565                         | 79.8            | 70.18  | 90.36  | 231           | 152.54  | 308.66  |
| GSP                                                                                               | 269666                         | 79.29           | 69.72  | 89.77  | 148.43        | 98.02   | 198.34  |
| BUF                                                                                               | 261310                         | 78.59           | 69.11  | 88.99  | 240.16        | 158.59  | 320.91  |
| OMA                                                                                               | 408958                         | 77.38           | 68.04  | 87.61  | 198.7         | 131.21  | 265.51  |
| HNL                                                                                               | 337256                         | 76.94           | 67.66  | 87.11  | 146.49        | 96.73   | 195.74  |

Table 23

| Indirect and direct effect of rain in a city – estimates and 95% CI<br>(Number of negative posts) |                                |                 |       |       |               |        |        |
|---------------------------------------------------------------------------------------------------|--------------------------------|-----------------|-------|-------|---------------|--------|--------|
| City Code                                                                                         | Population<br>(US Census 2010) | Indirect effect |       |       | Direct effect |        |        |
|                                                                                                   |                                | $\bar{I}_g$     | Lo95% | Hi95% | $\bar{D}_g$   | Lo95%  | Hi95%  |
| MSN                                                                                               | 233209                         | 75.29           | 66.21 | 85.25 | 157.48        | 103.99 | 210.42 |
| TUL                                                                                               | 391906                         | 73.27           | 64.43 | 82.96 | 182.92        | 120.79 | 244.42 |
| LGB                                                                                               | 462257                         | 70.16           | 61.7  | 79.44 | 82.38         | 54.4   | 110.08 |
| BTR                                                                                               | 229493                         | 69.06           | 60.73 | 78.19 | 144.26        | 95.26  | 192.76 |
| GKY                                                                                               | 365438                         | 68.67           | 60.38 | 77.75 | 77.07         | 50.89  | 102.98 |
| ORF                                                                                               | 242803                         | 66.44           | 58.43 | 75.23 | 69.23         | 45.72  | 92.51  |
| SDL                                                                                               | 217385                         | 64.1            | 56.37 | 72.58 | 56.15         | 37.08  | 75.03  |
| SJC                                                                                               | 945942                         | 63.62           | 55.95 | 72.04 | 124.93        | 82.5   | 166.93 |
| LEX                                                                                               | 295803                         | 62.26           | 54.75 | 70.49 | 166.71        | 110.08 | 222.76 |
| MES                                                                                               | 439041                         | 58.33           | 51.29 | 66.04 | 70.82         | 46.76  | 94.63  |
| SNP                                                                                               | 285068                         | 58.13           | 51.12 | 65.82 | 56.62         | 37.39  | 75.65  |
| AWO                                                                                               | 207627                         | 58.11           | 51.1  | 65.79 | 48.02         | 31.71  | 64.16  |
| CAK                                                                                               | 199110                         | 54.97           | 48.34 | 62.24 | 127.26        | 84.03  | 170.04 |
| ICT                                                                                               | 382368                         | 53.72           | 47.24 | 60.82 | 172.3         | 113.78 | 230.23 |
| OAK                                                                                               | 390724                         | 52.66           | 46.31 | 59.62 | 63            | 41.6   | 84.17  |
| PLA                                                                                               | 259841                         | 52.58           | 46.23 | 59.53 | 51.25         | 33.84  | 68.47  |
| TOL                                                                                               | 287208                         | 52.5            | 46.17 | 59.44 | 139.47        | 92.1   | 186.36 |
| ABQ                                                                                               | 545852                         | 51.48           | 45.27 | 58.29 | 124.55        | 82.25  | 166.42 |
| LNK                                                                                               | 258379                         | 48.66           | 42.79 | 55.09 | 113.83        | 75.17  | 152.11 |
| LBB                                                                                               | 229573                         | 45.6            | 40.1  | 51.63 | 83.81         | 55.34  | 111.98 |
| CPK                                                                                               | 222209                         | 44.53           | 39.16 | 50.42 | 48.25         | 31.86  | 64.47  |
| CHD                                                                                               | 236123                         | 42.98           | 37.8  | 48.67 | 44.24         | 29.21  | 59.11  |
| FAT                                                                                               | 494665                         | 40.7            | 35.79 | 46.08 | 114.99        | 75.94  | 153.66 |
| JCY                                                                                               | 247597                         | 40.27           | 35.41 | 45.6  | 79.44         | 52.46  | 106.15 |
| FWA                                                                                               | 253691                         | 39.61           | 34.83 | 44.85 | 112.57        | 74.33  | 150.42 |
| ELP                                                                                               | 649121                         | 38.59           | 33.94 | 43.69 | 89.57         | 59.15  | 119.68 |
| MGM                                                                                               | 205764                         | 38.23           | 33.62 | 43.29 | 83.39         | 55.07  | 111.43 |
| CRP                                                                                               | 305215                         | 36.17           | 31.81 | 40.95 | 72.06         | 47.58  | 96.28  |
| BOI                                                                                               | 205671                         | 34.14           | 30.02 | 38.66 | 98.93         | 65.33  | 132.19 |
| ANC                                                                                               | 291826                         | 33.83           | 29.75 | 38.3  | 82.87         | 54.72  | 110.73 |
| PIE                                                                                               | 244769                         | 33.8            | 29.72 | 38.27 | 36.59         | 24.16  | 48.89  |
| HND                                                                                               | 257729                         | 33.54           | 29.49 | 37.97 | 32.71         | 21.6   | 43.71  |
| RNO                                                                                               | 225221                         | 30.89           | 27.16 | 34.97 | 67.57         | 44.62  | 90.29  |
| BFL                                                                                               | 347483                         | 27.67           | 24.33 | 31.33 | 84.18         | 55.59  | 112.49 |
| RIV                                                                                               | 303871                         | 25.28           | 22.23 | 28.62 | 48.15         | 31.79  | 64.33  |
| GAR                                                                                               | 226876                         | 23.98           | 21.08 | 27.15 | 26.58         | 17.55  | 35.52  |
| SCK                                                                                               | 291707                         | 19              | 16.71 | 21.51 | 40.11         | 26.49  | 53.6   |
| HTS                                                                                               | 189992                         | 18.27           | 16.07 | 20.69 | 49            | 32.36  | 65.48  |
| ANA                                                                                               | 336265                         | 18.18           | 15.99 | 20.59 | 30.24         | 19.97  | 40.41  |
| CHU                                                                                               | 243916                         | 17.9            | 15.74 | 20.27 | 18.21         | 12.03  | 24.34  |
| MOD                                                                                               | 201165                         | 15.42           | 13.56 | 17.46 | 37.16         | 24.54  | 49.65  |
| GEU                                                                                               | 226721                         | 14.99           | 13.18 | 16.97 | 13.86         | 9.15   | 18.52  |
| EWR                                                                                               | 277140                         | 13.44           | 11.81 | 15.21 | 27.85         | 18.39  | 37.21  |
| HIA                                                                                               | 224669                         | 11.27           | 9.91  | 12.76 | 12.02         | 7.94   | 16.06  |
| LRD                                                                                               | 236091                         | 9.46            | 8.31  | 10.71 | 27.13         | 17.92  | 36.25  |
| SNA                                                                                               | 324528                         | 8.65            | 7.61  | 9.8   | 17.44         | 11.52  | 23.31  |
| SBD                                                                                               | 209924                         | 7.51            | 6.6   | 8.5   | 15.98         | 10.55  | 21.36  |
| NHE                                                                                               | 226322                         | 5.35            | 4.71  | 6.06  | 6.01          | 3.97   | 8.03   |
| RDU                                                                                               | 228330                         | 1.22            | 1.07  | 1.38  | 28.31         | 18.69  | 37.82  |
| AUR                                                                                               | 325078                         | 0.31            | 0.27  | 0.35  | 3.87          | 2.55   | 5.17   |

Table 24

## Bibliography

- [1] JW Pennebaker, CK Chung, M Ireland, A Gonzales, RJ Booth, The development and psychological properties of LIWC2007. <http://www.liwc.net>.
- [2] JM Wooldridge (2001), Econometric analysis of cross section and panel data. MIT press.
- [3] Kleibergen, F, and Paap, R (2006). Generalized reduced rank tests using the singular- value decomposition. *Journal of Econometrics* 127: 97126.
- [4] Waxman, B. M. (1988). Routing of multipoint connections. *IEEE Journal on Selected Areas in Communications* 6(9), 1617-1622.
- [5] Stock, J. H., and M. Yogo (2005), Testing for weak instruments in linear IV regression. In *Identification and Inference for Econometric Models: Essays in Honor of Thomas Rothenberg*, ed. D. W. K. Andrews and J. H. Stock, 80108. Cambridge University Press.
- [6] CF Baum, ME Schaffer, S Stillman (2007), Enhanced routines for instrumental variables/GMM estimation and testing, *Stata Journal* 7(4):465–506.
